# Supplementary material for: Development of Fluorescence-Tagged SARS-CoV-2 Virus-like Particles by a Tri-Cistronic Vector Expression System for Investigating the Cellular Entry of SARS-CoV-2
Source: MDPI journal article supplement (doi:10.3390/v14122825), 2022-12-19
Supplement: s1 [file s1]

- A. **GGGCCC**TCATGGCGGACAGCAACGGTACCATCACCGTGGAGGAACTGAAGAAACTGCTGGAGCA  
GTGGAACCTGGTTATCGGCTTCCTGTTTCTGACCTGGATTGCTGCAATTCGCGTACGCGAACC  
GTAACCGTTTTCTGTACATCATCAAGCTGATTTTCTGTGGCTGCTGTGGCCGGTGACCCTGGCGTGC  
TTTGTGCTGGCGGCGGTTTACCGTATCAACTGGATTACCGGTGGCATCGCGATTGCGATGGCGTGCC  
TGGTTGGTCTGATGTGGCTGAGCTATTTATCGCGAGCTTCCGTCTGTTTGC GCGTACCCGTAGCATG  
TGGAGCTTCAACCCGGAGACCAACATCCTGCTGAACGTGCCGCTGCACGGCACCATTTCTGACCCGTC  
CGCTGCTGGAGAGCGAACTGGTGATCGGTGCGGTTATTCTGCGTGGCCACCTGCGTATTGCGGGTCA  
CCACCTGGGCCGTTGCGACATCAAGGATCTGCCGAAAGAAATTACCGTGGCGACCAGCCGTACCCTG  
AGCTACTATAAGCTGGGTGCGAGCCAGCGTGTTGCGGGTGACAGCGGTTTTGCGGCGTACAGCCGTT  
ATCGTATCGGCAACTACAACTGAACACCGACCACAGCAGCAGCAGCGATAACATTGCGCTGCTGGTT  
CAG**GGGCCC**
- B. MADSNGTITVEELKKLLEQWNLVIGFLFTWICLLQFAYANRNRFLYIIKLIFLWLLWPVTLACFVLAAYRIN  
WITGGIAIAMACLVGLMWLSYFIASFRLFARTRSMWSFNPETNILLNVPLHGTILTRPLLESELVIGAVILRG  
HLRIAGHHLGRCDIKDLPKEITVATSRTLSTYKLGASQRVAGDSGFAAYSRYRIGNYKLNTDHSSSDNIA  
LLVQ
- C. nCoV-M NotI-F: 5'-ATATGCGGCCGCTCATGGCGGACAGCAACGGT-3'  
nCoV-M ApaI-R: 5'-ATATGGGCCCTGAACCAGCAGCGCAAT-3'

**Supplemental FigureS1. Nucleotide sequence and cloning of codon optimized synthetic gene of SARS-CoV-2 membrane (M) protein.** The codon optimized synthetic membrane (M) protein gene of SARS-CoV-2 Wuhan-Hu-1 strain (NCBI Reference Sequence: NC\_045512.2) was chemically synthesized and cloned in the plasmid pET-32a(+)-M protein (kindly provided by Dr. Shih-Wein Li at Institut Pasteur of Shanghai, Chinese Academy of Sciences). Nucleotide and deduced amino acid sequences of SARS-CoV-2 M protein gene were listed (A, B), and used as the template for PCR amplification with a specific primer pair (C). Finally, the codon optimized synthetic gene of SARS-CoV-2 M protein was cloned into the restriction enzyme sites NotI/ApaI of pcDNA3.1/HisC-T2A-F2A.

- A. **ATCGAT**ATGTACTCATTTCGTTTCGGAAGAGACAGGTACGTTAATAGTTAATAGCGTACTTCTTTTCTTGCTTCGTGGTATTCTTGCTAGTTACACTAGCCATCCTTACTGCGCTTCGATTGTGTGCGTACTGCTGCAATATTGTTAACGTGAGTCTCGTAAACCTTCTTTTACGTTTACTCTCGTGTTAAAAATCTGAATTCTTCTAGAGTTCCTGATCTTCTGGTC**ATCGAT**
- B. MYSFVSEETGLIVNSVLLFLAFVVFLVTLAILTALRLCAYCCNIVNVSLVKPSFYVYSRVKNLNSSRPDL  
LV
- C. nCoV-E ClaI-F: 5'-ATATATCGATATGTACTCATTTCGTTTCGG-3'  
nCoV-E ClaI-R: 5'-ATATATCGATGACCAGAAGATCAGGAAC-3'

**Supplemental FigureS2. Nucleotide/amino acid sequences and cloning of SARS-CoV-2 envelope (E) protein gene.** The envelope (E) protein gene of SARS-CoV-2 Wuhan-Hu-1 strain (NCBI Reference Sequence: NC\_045512.2) was chemically synthesized and cloned in the plasmid pCAG.2-HA-SARS-CoV-2-E-HA (kindly provided by Professor Che Alex Ma at Genomics Research Center, Academia Sinica, Taiwan). Nucleotide and deduced amino acid sequences of SARS-CoV-2 E protein gene were listed (A, B), and used as the template for PCR amplification with a specific primer pair (C). Finally, the codon optimized synthetic gene of SARS-CoV-2 E protein was cloned into the restriction enzyme site ClaI of pcDNA3.1/HisC-T2A-F2A-nCoV M.

**B.** MFVFLVLLPLVSSQCVNLTTTRTQLPPAYTNSFTRGVYPDKVFRSSVLHSTQDLFLPFFSNVTWFHAIHVS GTNGTKRFDNPVLPFNDGVYFASTEKSNIIRGWIFGTTLD SKT  
QSSLIVNNATNVV/VIKVCE/FQFCNDPFLGVYYHKNNKSWMESEFRVYSSANNCTFEYVSQPFMDLEGKQGNFKNREFVFKNIDGYFKIYSKHTPINLVRDLPQGFSALEPLV  
DLPIGINITRFQTLALLHRSYLT PGDSSSGW TAGAAAYYVG YLQPRTFLLKY NENG TITDAVDCALDPLSETKCTLKSFTVEKGIYQTSNFRVQPTESIVRFPNITNLCPFGEVFN  
ATRFASVYAWNRKRISNCVADY SVLYNSASFSTFKCYGVSP TKLNDLCFTNVYADSFVIRGDEVRQIAPGQTGKIADYNYKLPDDFTGCVIAWNSNNLDSKVGGNYNYLYRLF  
RKSNLKPFERDISTEIIYQAGSTPCNGVEGFNCYFPLQSYGFGQPTNGVGYPYRVVLSFELLHAPATVCGPKKSTNLVKNCVNFNFNGLTGQVLTESNKKYLPFQQFGGRDI  
ADTTDAVRDPQTLEILDITPCSF GGVSVITPGTNTSNQVAVLYQDVNCTEYVPVAIHADQLPTWRVYSTGSNVFQTRAGCLIGA EHVNSYECDIPGAGIKASQQTQTSNPRR  
ARSVASQSIIAYTMSLGAENSVAYSNN SIAIPTNFTISV TTEILPVSMKTCTSV DCTMYICGDSTEC SNLLQLQYGSFCTQLNRALT GIAVEQDKNTQEVFAIGKQKIYKTPPIKDFGGF  
NFSQILPDPSKPSKRSFIEDLLFNKVT LADAGFIKQYGDCLGDIAARDLICAQKFNGLT VLPPLLTDEMAIAYTSALLAGTITSGWTFGAGAALQIPFAMQMAYRFNGIGVTQNVL  
YENQKLIANQFN SIAIGKIQDSL S STASALGKLQDVVNQNAQAALNTLVKQLSSNFGAISSVLNDILSRLDKVEAEVQIDRLITGR LQSLQTYVTQQLIRAAEIRASANLAATKMSEC  
VLGQSKRVDFCKGKYHLSMFPQSAPHGVVFLHVTYVPAQEKNFTTAPAICH DGKAHFPREGV FVSNGTHWFVTQRNFYEPQIITDNTFVSGNCDVVIGIVNNTVYDPLQPE  
LDSFPEELDKYFKNHTSPD VDLGDISGINASVVNIQKEIDRLNEVAKNLN ES LIDLQELGKYEQYIKWPWYIWLGFIAGLIAIVMVTIMLCCMTSCC SCLKGCCSCGSCCKFDED  
DSEPKVLKGVKLHYHT

**Supplemental Figure S3. Nucleotide/amino acid sequences and cloning of SARS-CoV-2 Wuhan-Hu-1 spike (S) protein gene.** Spike (S) protein gene of SARS-CoV-2 Wuhan-Hu-1 strain (NCBI Reference Sequence: NC\_045512.2) was chemically synthesized and cloned in the plasmid pCMV3-2019-nCoV-Spike (S1+S2)-long (kindly provided by Professor Che Alex Ma at Genomics Research Center, Academia Sinica, Taiwan). Nucleotide and deduced amino acid sequences of SARS-CoV-2 S protein gene were listed (A, B), and used as the template for PCR amplification with a specific primer pair (C). Finally, the SARS-CoV-2 Wuhan-Hu-1 S protein gene was cloned into the restriction enzyme sites KpnI/AscI of pcDNA3.1/HisC-T2A-F2A-nCoV E-nCoV M.
